# Supplementary material
Source: PubMed Central journal article supplement (PMC5278635)
Supplement: NIHMS834001-supplement-1.pdf [file NIHMS834001-supplement-1.pdf]

**Table S1. Summary of Diffraction Data and Structure Refinement Statistics Related to Figure 1-6**

| <b>Crystals</b>                          | <b>Binary</b>                                 | <b>Ternary<br/>DNA1<sup>a</sup></b> | <b>Ternary<br/>DNA2<sup>b</sup></b> | <b>Ternary<br/>DNA3<sup>c</sup></b> |
|------------------------------------------|-----------------------------------------------|-------------------------------------|-------------------------------------|-------------------------------------|
| Beam line                                | APS-ID24E                                     | APS-ID24E                           | APS-ID24C                           | APS-ID24C                           |
| Wavelength (Å)                           | 0.9794                                        | 0.9792                              | 0.9792                              | 0.9792                              |
| Space group                              | P2 <sub>1</sub> 2 <sub>1</sub> 2 <sub>1</sub> | I222                                | I222                                | I222                                |
| Cell parameters                          |                                               |                                     |                                     |                                     |
| <i>a</i> (Å)                             | 83.47                                         | 117.25                              | 116.75                              | 113.51                              |
| <i>b</i> (Å)                             | 128.20                                        | 182.15                              | 184.81                              | 179.29                              |
| <i>c</i> (Å)                             | 155.79                                        | 216.79                              | 214.29                              | 217.35                              |
| Resolution (Å)                           | 50.0-3.25<br>(3.48-3.25) <sup>d</sup>         | 50.0-2.89<br>(2.98-2.89)            | 50.0-2.92<br>(3.02-2.92)            | 50.0-3.75<br>(4.05-3.75)            |
| R <sub>pim</sub>                         | 0.063 (0.823)                                 | 0.074 (0.711)                       | 0.062 (0.859)                       | 0.136 (1.633)                       |
| Average I/σ(I)                           | 10.2 (1.0)                                    | 11.7 (1.2)                          | 10.1 (0.8)                          | 5.2 (0.6)                           |
| Completeness (%)                         | 99.2 (95.6)                                   | 100.0 (100.0)                       | 99.8 (100.0)                        | 99.8 (99.7)                         |
| CC(1/2)                                  | 0.990 (0.318)                                 | 0.996 (0.480)                       | 0.998 (0.368)                       | 0.995 (0.399)                       |
| Average redundancy                       | 5.9 (5.7)                                     | 14.3 (11.8)                         | 5.5 (5.6)                           | 5.9 (5.7)                           |
| No. of unique reflections                | 26,144                                        | 52,222                              | 50,264                              | 22,006                              |
| <b>Refinement and structure model</b>    |                                               |                                     |                                     |                                     |
| R <sub>work</sub> /R <sub>free</sub> (%) | 26.1/32.4                                     | 19.4/24.2                           | 19.9/24.4                           | 24.2/28.4                           |
| No. of non-H atoms                       | 9340                                          | 11854                               | 11846                               | 11817                               |
| Average B factor (Å <sup>2</sup> )       |                                               |                                     |                                     |                                     |
| Protein                                  | 104                                           | 55                                  | 85                                  | 159                                 |
| DNA                                      | -                                             | 63                                  | 68                                  | 166                                 |
| RNA                                      | 156                                           | 73                                  | 106                                 | 188                                 |
| RMS deviations                           |                                               |                                     |                                     |                                     |
| Bond lengths (Å)                         | 0.689                                         | 0.614                               | 0.666                               | 0.723                               |
| Bond angles (°)                          | 0.004                                         | 0.002                               | 0.003                               | 0.004                               |
| <b>Ramachandran plot (%)</b>             |                                               |                                     |                                     |                                     |
| Favored                                  | 90.6                                          | 94.4                                | 92.7                                | 92.5                                |
| Allowed                                  | 9.4                                           | 5.6                                 | 7.3                                 | 7.5                                 |
| Outliers                                 | 0                                             | 0                                   | 0                                   | 0                                   |

<sup>a</sup> Aac2c1 in complex with 8-mer excess ssDNA.

<sup>b</sup> Aac2c1 in complex with extended target DNA strand.

<sup>c</sup> Aac2c1 in complex with extended non-target DNA strand.

<sup>d</sup> Highest resolution shell (in Å) shown in parentheses.
