# Supplementary material
Source: PubMed Central journal article supplement (PMC5278635)

**AacC2c1**

**AsCpf1**

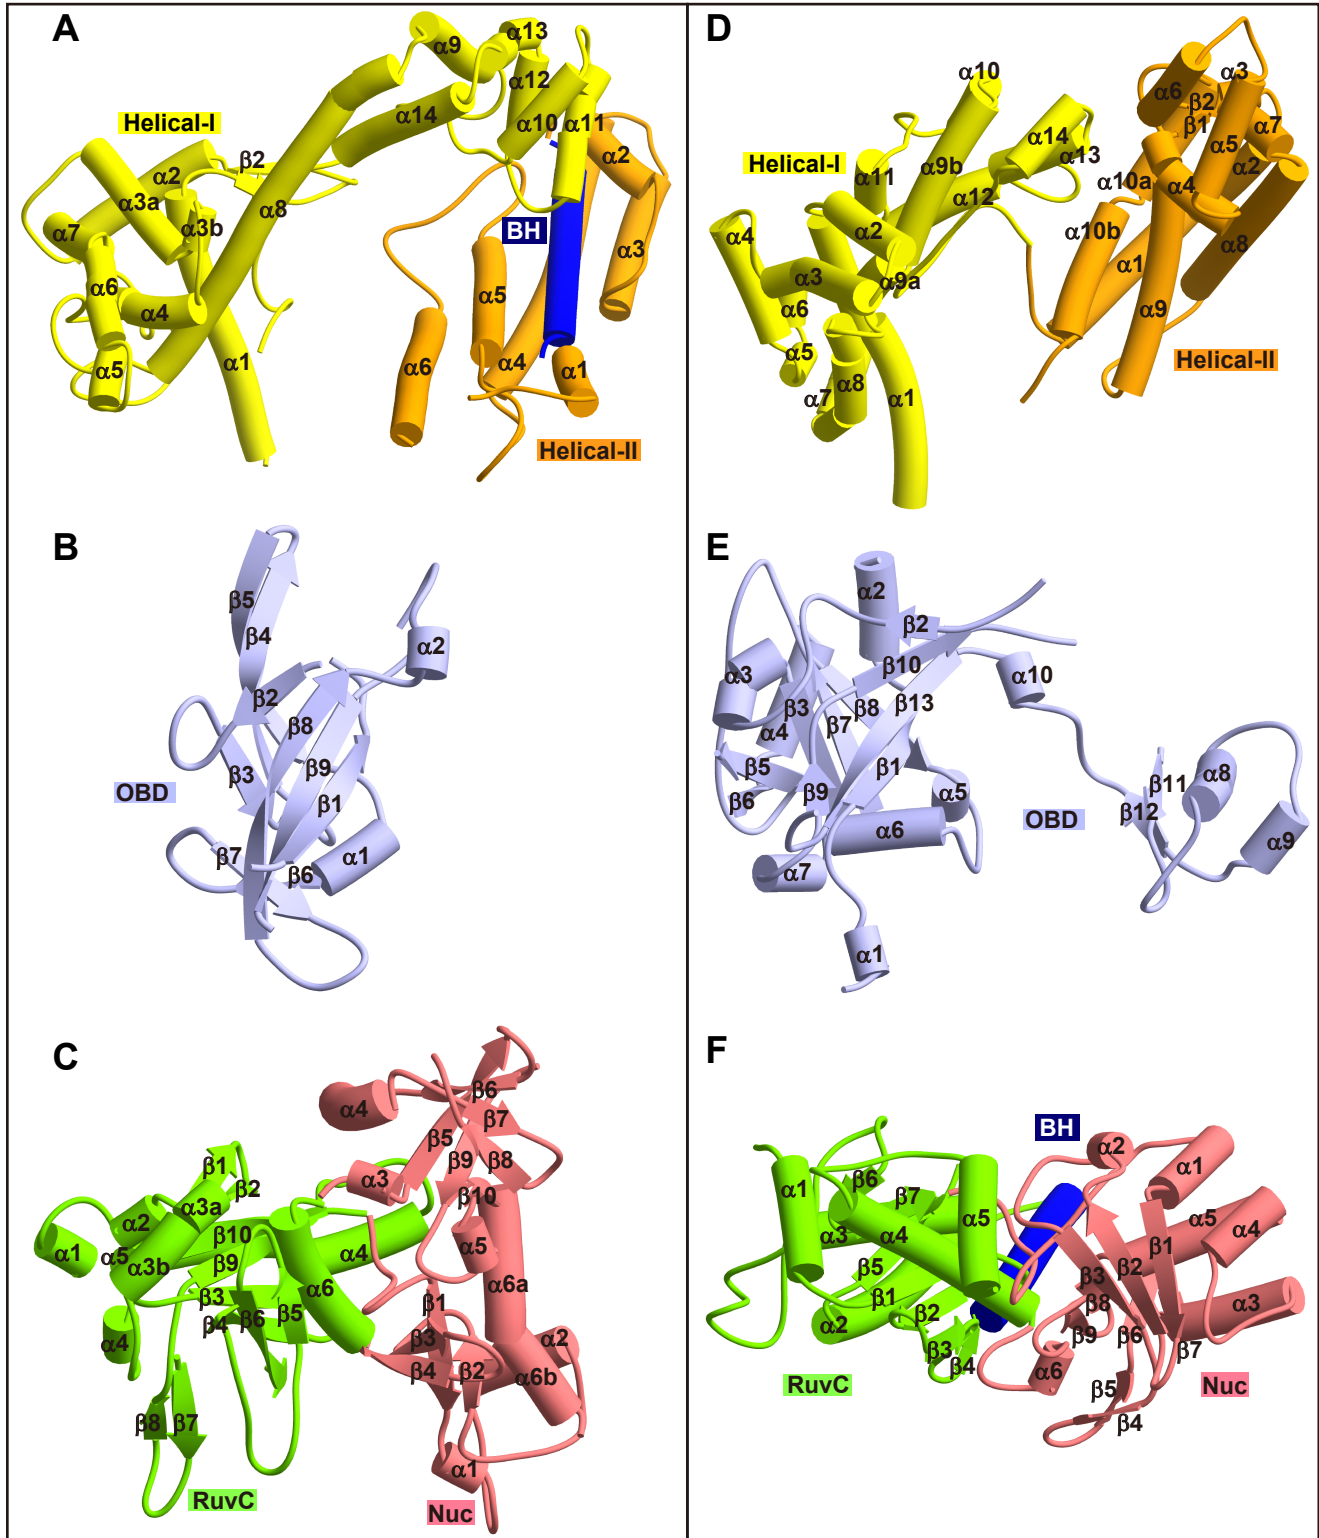

**Figure S1**

Supplement: NIHMS834001-supplement-2.pdf [file NIHMS834001-supplement-2.pdf]

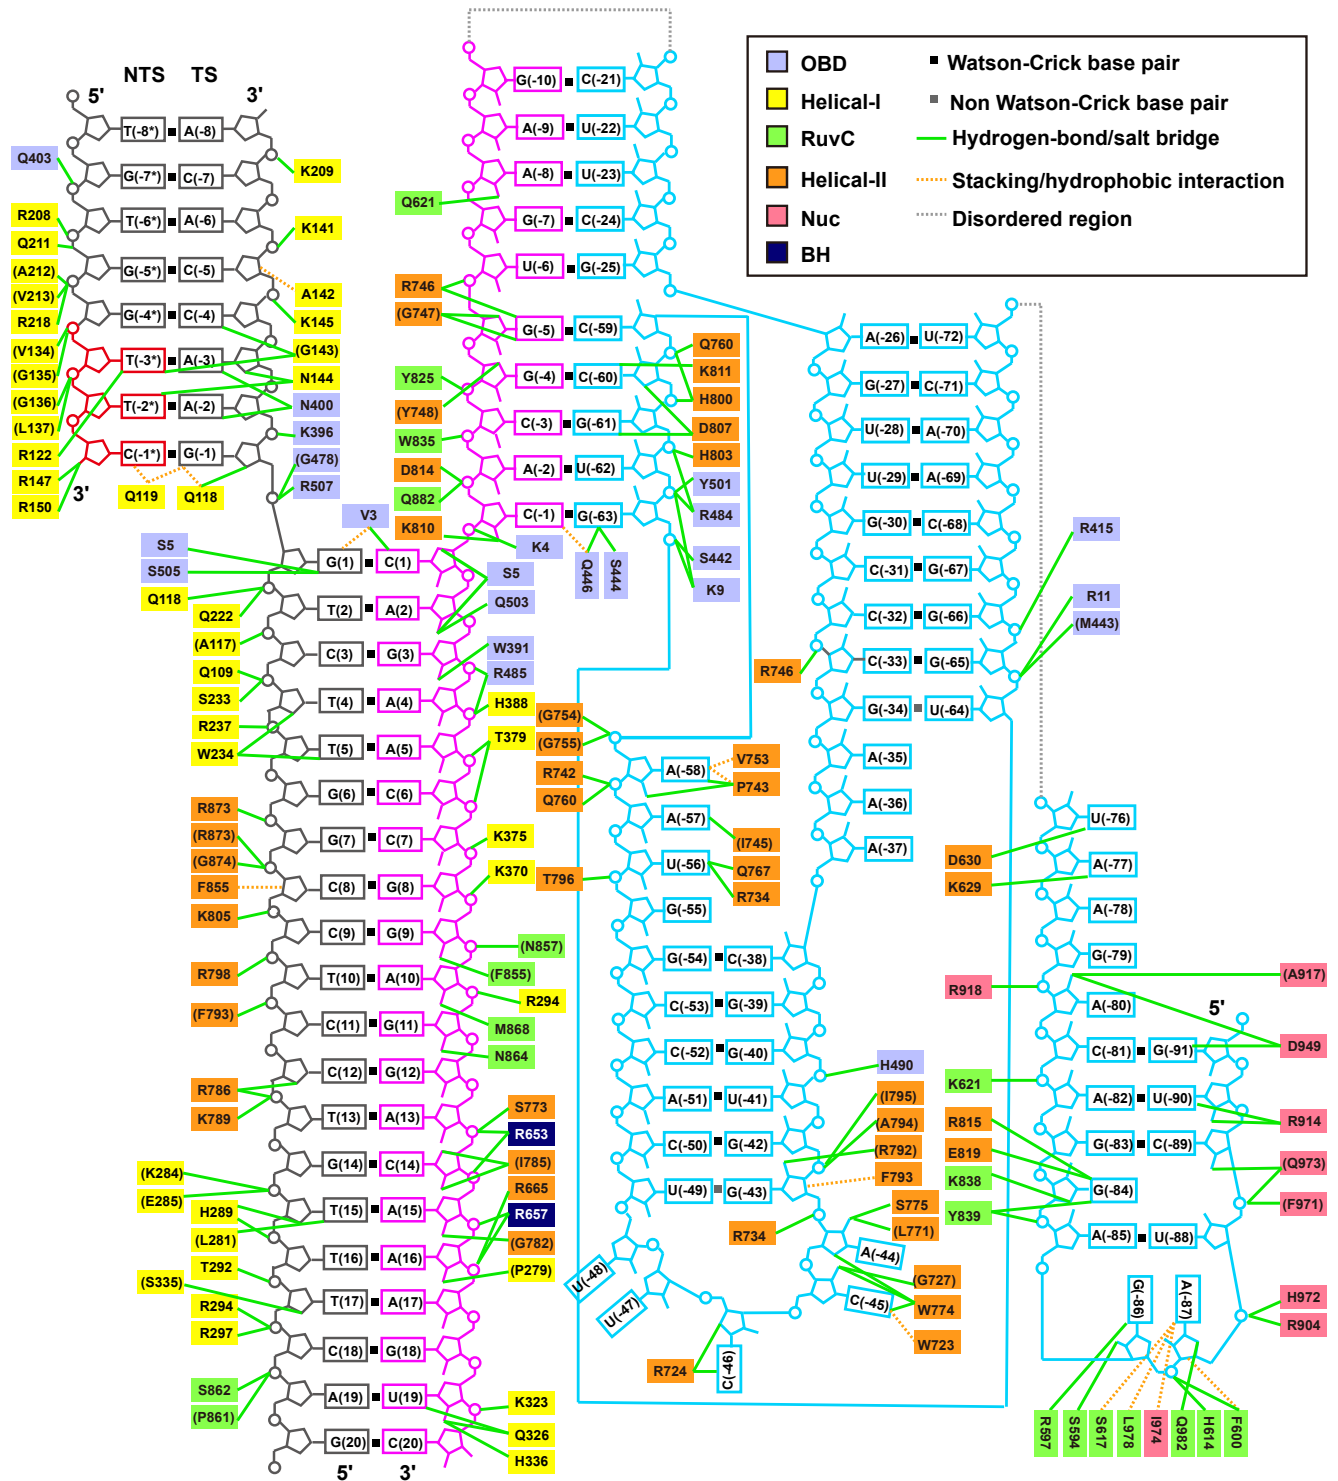

Figure S2

Supplement: NIHMS834001-supplement-3.pdf [file NIHMS834001-supplement-3.pdf]

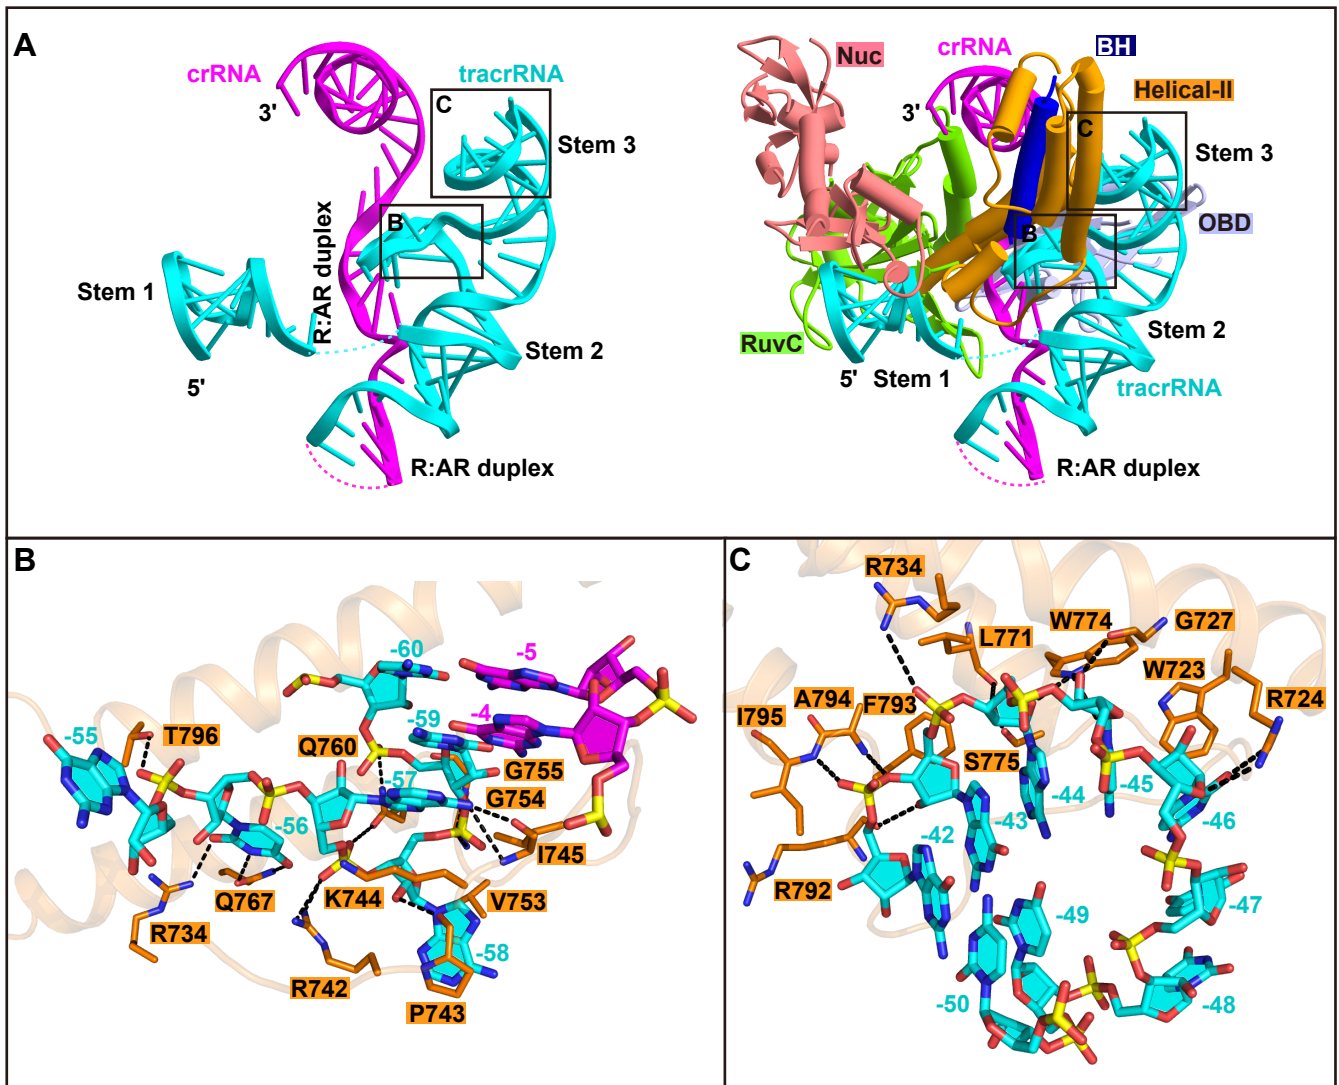

Figure S3

Supplement: NIHMS834001-supplement-4.pdf [file NIHMS834001-supplement-4.pdf]

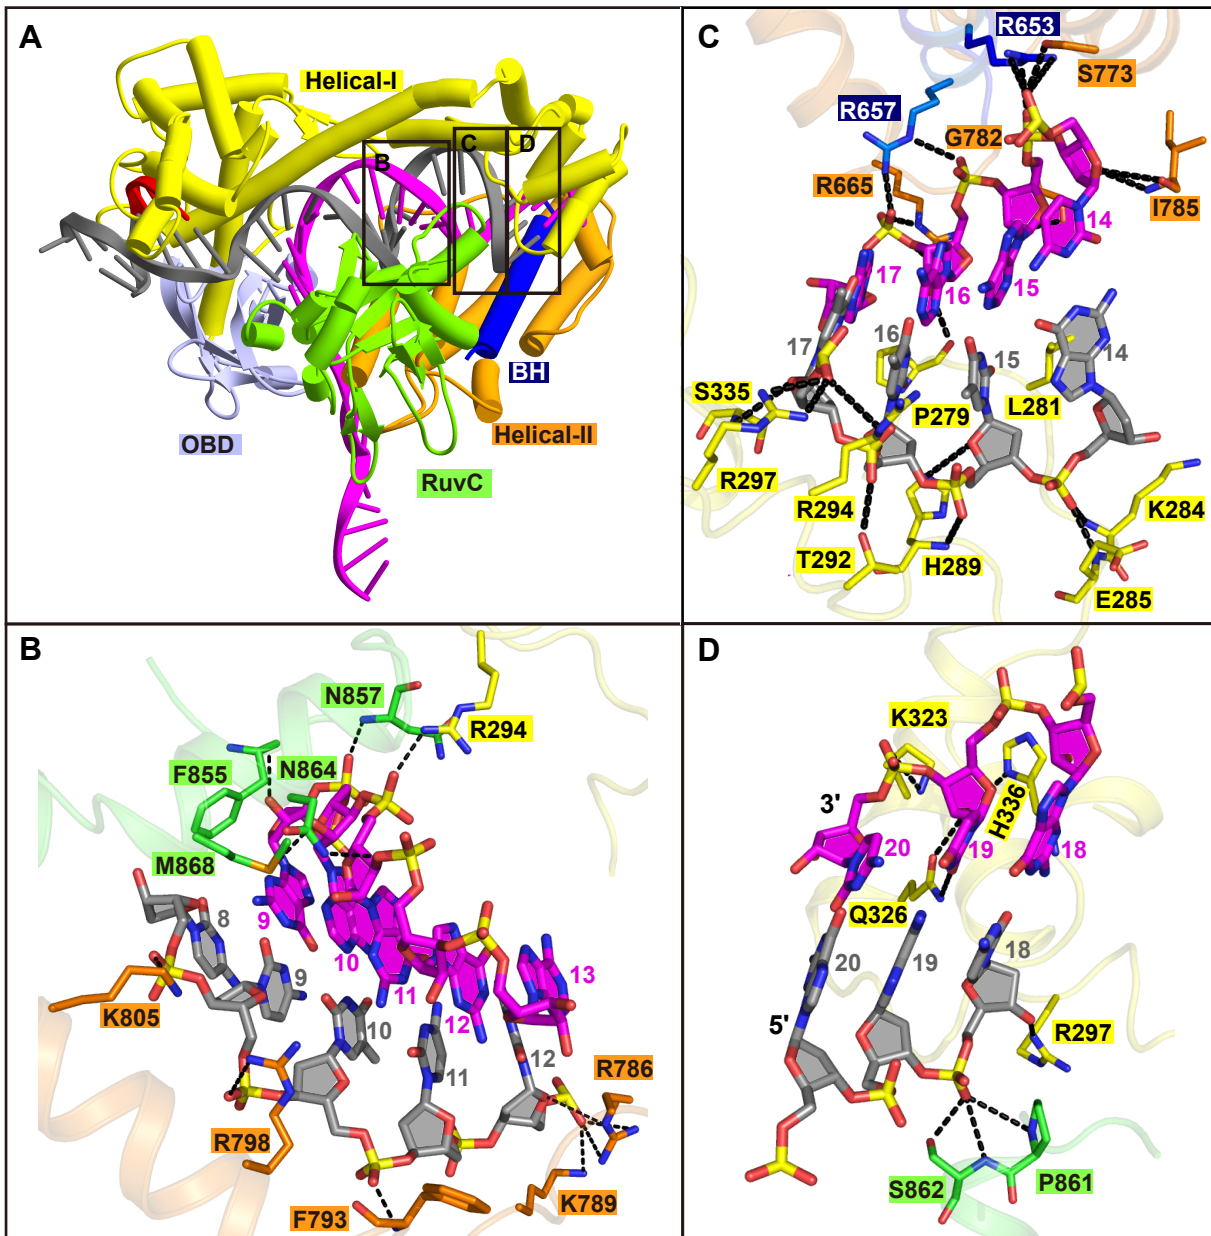

Figure S4

Supplement: NIHMS834001-supplement-5.pdf [file NIHMS834001-supplement-5.pdf]

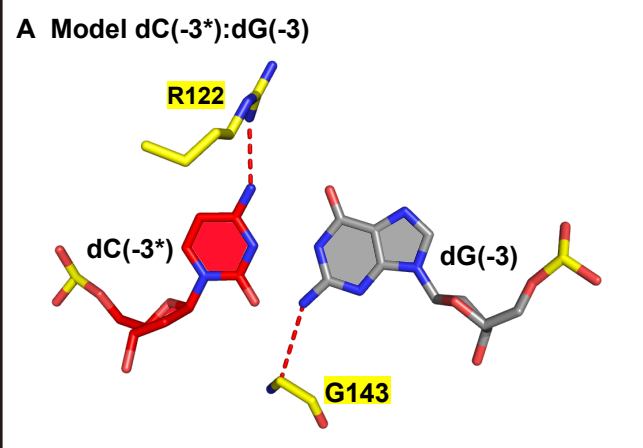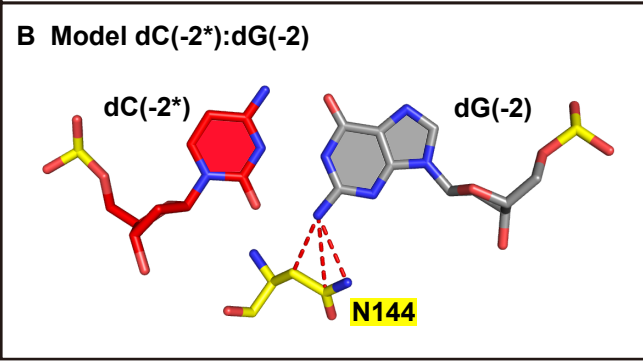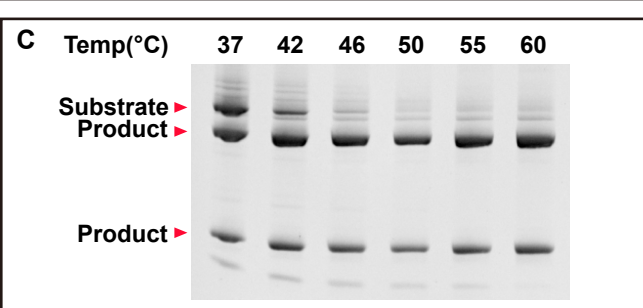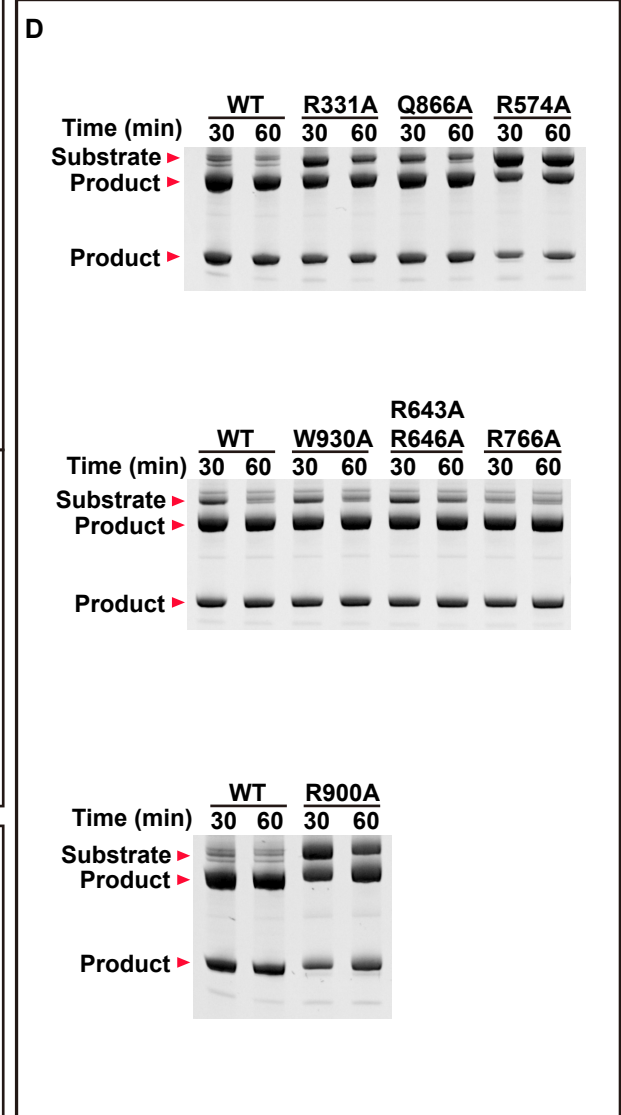

Figure S5

Supplement: NIHMS834001-supplement-6.pdf [file NIHMS834001-supplement-6.pdf]

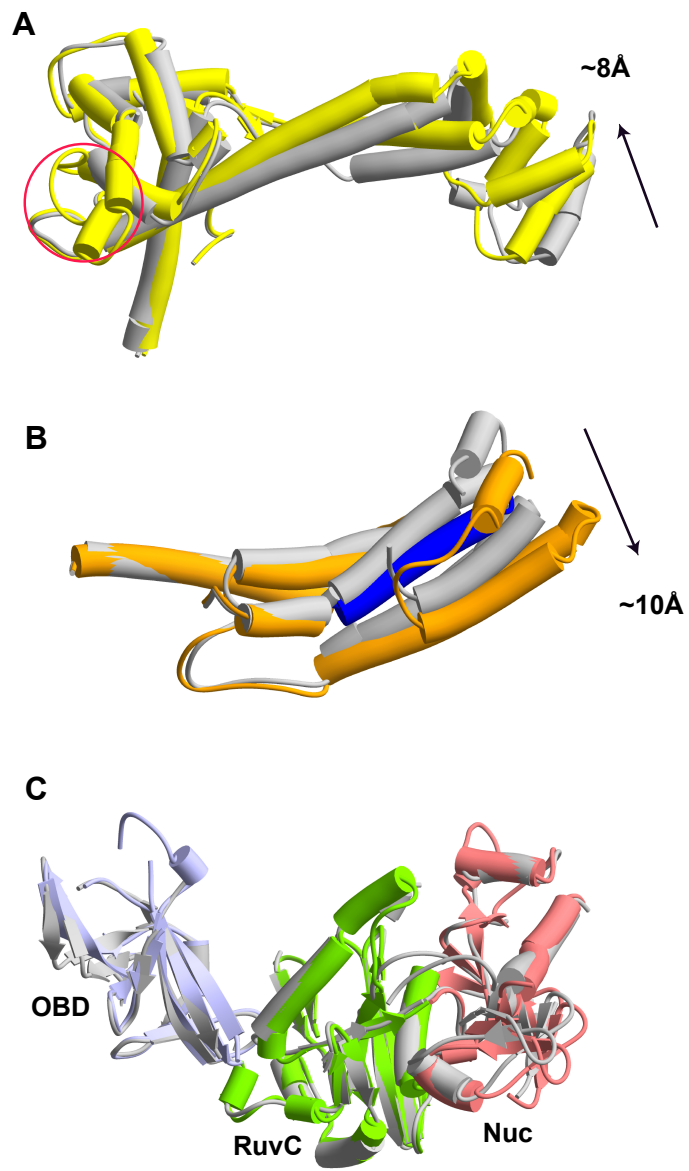

Figure S6

Supplement: NIHMS834001-supplement-7.pdf [file NIHMS834001-supplement-7.pdf]

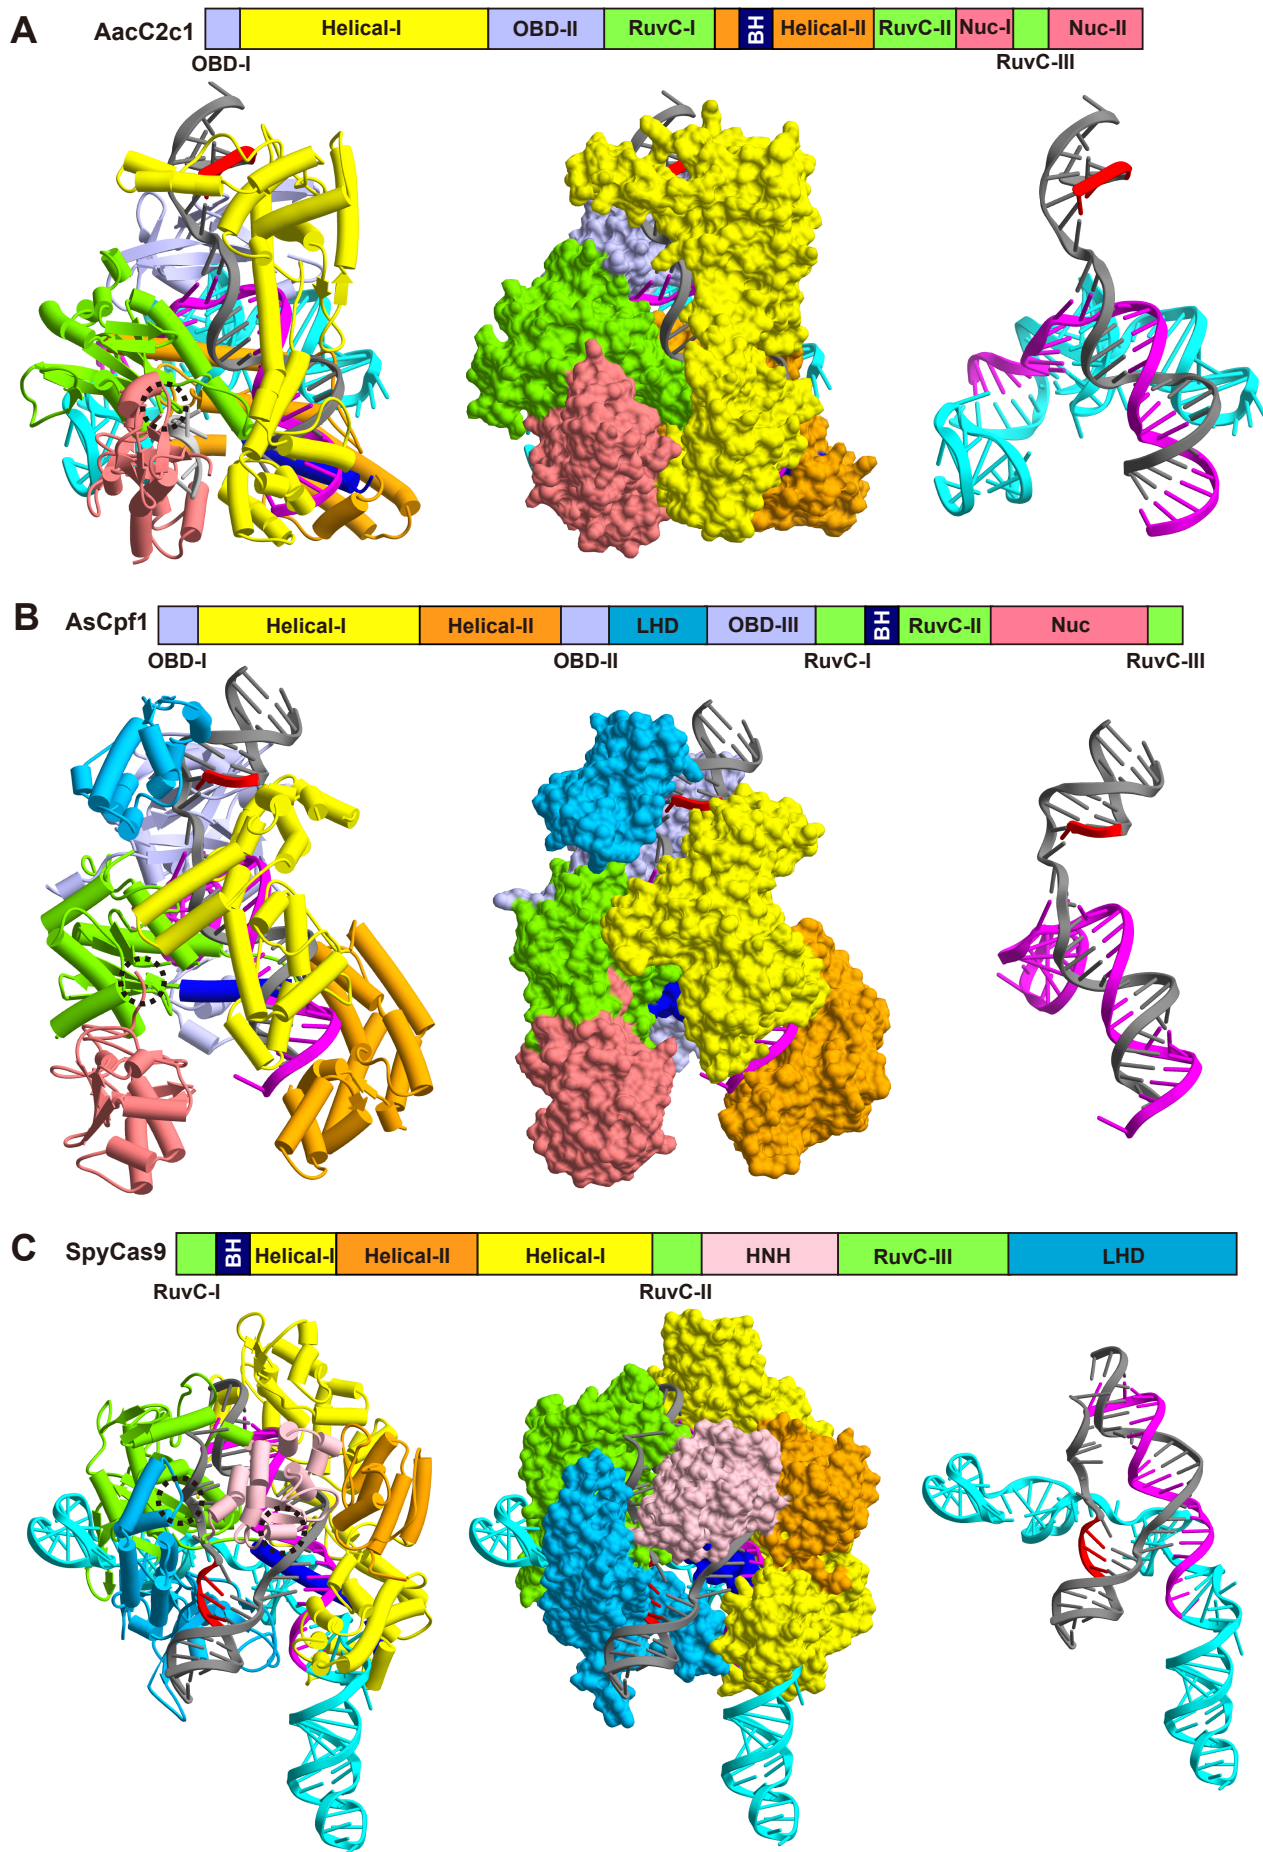

Figure S7

Supplement: NIHMS834001-supplement-8.pdf [file NIHMS834001-supplement-8.pdf]
